# Supplementary material for: Cdx2 regulation of posterior development through non-Hox targets
Source: Oxford University Press journal article supplement (doi:10.1242/dev.041582), 2009-11-12
Supplement: dev041582-tables1.pdf [file dev041582-tables1.pdf]

**Table S1. Probes and primers used for in situ hybridization, EMSA and PCR analysis**

| Gene                     |        | Forward                       | Reverse                   |
|--------------------------|--------|-------------------------------|---------------------------|
| <i>Mesogenin 1</i>       | RT-PCR | TGGACAACCTGGGTGAGACC          | TGTGGCCTGGGCTCTCTCCC      |
| <i>Wnt3a</i>             | ChIP   | GAGAAGCTGGAGCACATCCAACTTGTACC | CCCTGGATCTCAAGCTCCAAGCACC |
| <i>T</i>                 | ChIP   | CCGCGGGGCAAAGTCGCAGGCGCC      | CCTCCCGCCACCCTCTCCA       |
| <i>Cyp26a1</i>           | ChIP   | GGCTTGGCGGTATTACTACAGTGGAG    | CTTTAACCGTTTGTTCGCGCCG    |
| <i>Cyp26a1</i>           | ChIP   | GCCGGTGCCAGAAATCGGTTCTCATTC   | CCTTGGCTCGCCTGTATCTTGG    |
| EMSA                     |        | WT                            | Mutant                    |
| <i>Wnt3a</i>             |        | ATGCATGAGTTTATGGAGAGAG        | ATGCATGAGCCCGGGGAGAGAG    |
| <i>T</i>                 |        | CGGCTGTATTTATGGGGAGG          | CGGCTGCCCGGGTGGGGAGG      |
| <i>Cyp26a1</i>           |        | TGAGGTCATTTTATGACACCCCC       | TGAGGTCACCCGGGGACACCCCC   |
| Semi-quantitative RT-PCR |        | Forward                       | Reverse                   |
| <i>Wnt3a</i>             |        | CCCGGGAGTCAGCCTTTGTCC         | GACCAGGTCGCGTTCTGTCCG     |
| <i>T</i>                 |        | CTGTCCATGCTGCAGTCCCATG        | CAAGAGCCTGCCACTTTGAGCC    |
| <i>Cyp26a1</i>           |        | GAATCCTCCGTTCCAGGAGGG         | CCACGGGACTGTAGTAGAGACAC   |
