# Supplementary figures and images for: Cdx2 regulation of posterior development through non-Hox targets
Source: Oxford University Press journal article supplement (doi:10.1242/dev.041582), 2009-11-12

**A**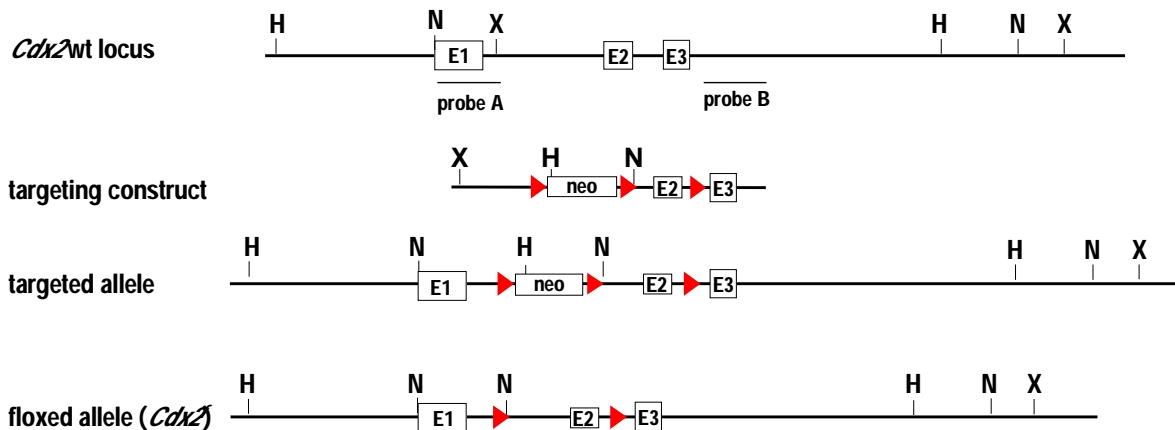**B**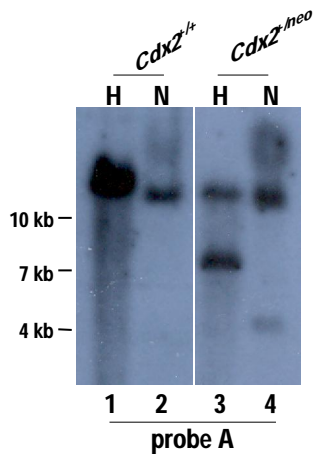**C**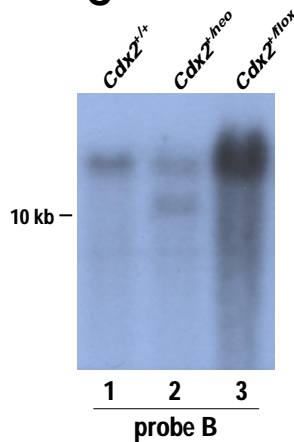**D**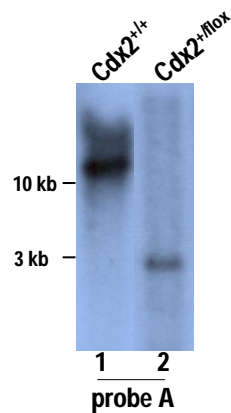

Supplement: dev041582-sup-041582-figs1.pdf [file dev041582-sup-041582-figs1.pdf]

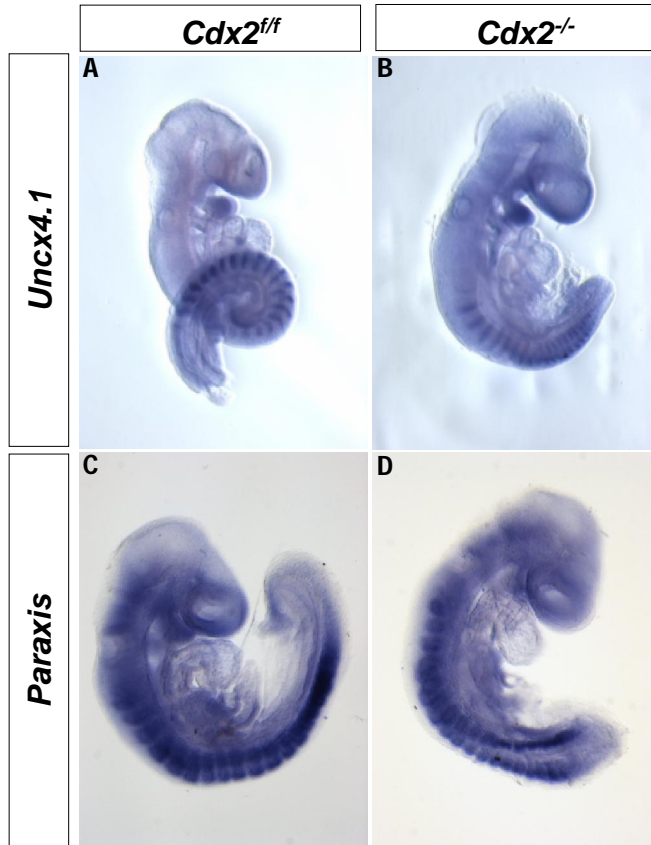

Supplement: dev041582-sup-041582-figs2.pdf [file dev041582-sup-041582-figs2.pdf]

**Cdx2<sup>fl/f</sup>**

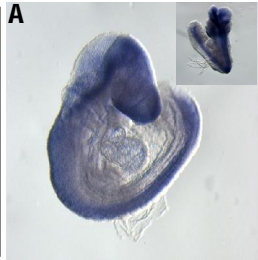

**Cdx2<sup>-/-</sup>**

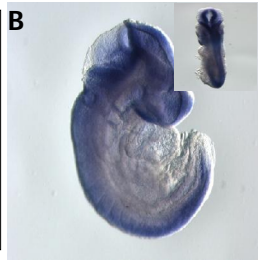

Supplement: dev041582-sup-041582-figs3.pdf [file dev041582-sup-041582-figs3.pdf]

***Cdx2<sup>f/f</sup>***

***Cdx2<sup>-/-</sup>***

**A**

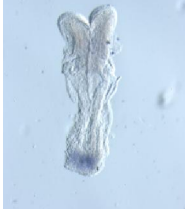

**B**

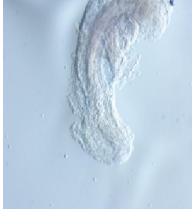

**C**

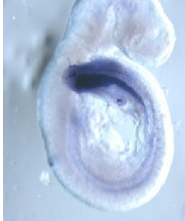

**D**

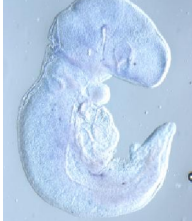

Supplement: dev041582-sup-041582-figs4.pdf [file dev041582-sup-041582-figs4.pdf]
